# Supplementary material
Source: PubMed Central journal article supplement (PMC7657118)
Supplement: CAS-104-178-s001.pdf [file CAS-104-178-s001.pdf]

Supplemental Fig. 1

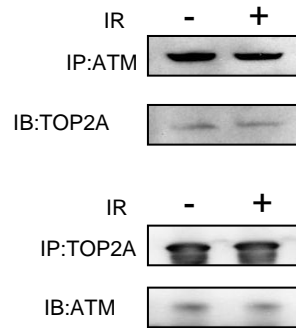

ATM and TOP2A interaction was examined by immunoprecipitation. Cells were harvested 1 hr after 10 Gy irradiation, and subjected immunoprecipitation.
